# Supplementary material for: Immune system adaptation during gender-affirming testosterone treatment
Source: PubMed Central journal article supplement (PMC11374716; doi:10.1038/s41586-024-07789-z), 2024-09-04
Supplement: 41586_2024_7789_MOESM1_ESM.pdf [file 41586_2024_7789_MOESM1_ESM.pdf]

## Supplementary information

---

# Immune system adaptation during gender-affirming testosterone treatment

---

In the format provided by the authors and unedited

**Table 1. Broad extension panel of antibodies used in mass cytometry.**

| <b>Metal tag</b> | <b>Marker</b> | <b>Catalog number</b> | <b>Antibody dilution, times</b> | <b>Clone</b> | <b>Vendor*</b>           |
|------------------|---------------|-----------------------|---------------------------------|--------------|--------------------------|
| 89Y              | CD45          | 3089003B              | 200                             | HI30         | Standard BioTools        |
| 102Pd            | Barcode       | 201060                | -                               | -            | Standard BioTools        |
| 104Pd            | Barcode       | 201060                | -                               | -            | Standard BioTools        |
| 105Pd            | Barcode       | 201060                | -                               | -            | Standard BioTools        |
| 106Pd            | Barcode       | 201060                | -                               | -            | Standard BioTools        |
| 108Pd            | Barcode       | 201060                | -                               | -            | Standard BioTools        |
| 110Cd            | CD33          | 303402                | 125                             | WM53         | BioLegend                |
| 111Cd            | CD26          | 302702                | 60                              | BA5b         | BioLegend                |
| 112Cd            | CD11c         | 337202                | 60                              | Bu15         | BioLegend                |
| 113Cd            | IgD           | 348202                | 250                             | IA6-2        | BioLegend                |
| 114Cd            | HLA-DR        | 307602                | 125                             | L243         | BioLegend                |
| 115In            | CD57          | 322302                | 200                             | HCD57        | BioLegend                |
| 140Ce            | CD71          | 334102                | 200                             | CY1G4        | BioLegend                |
| 141Pr            | CD49d         | 3141004B              | 100                             | 9F10         | Standard BioTools        |
| 142Nd            | CD43          | 14-0439-82            | 125                             | 84-3C1       | eBiosciences             |
| 143Nd            | CD3e          | 317302                | 250                             | UCHT1        | BioLegend                |
| 144Nd            | CD45RB        | 310202                | 125                             | MEM-55       | BioLegend                |
| 145Nd            | CD81          | 349502                | 60                              | 5A6          | BioLegend                |
| 146Nd            | CD52          | 316002                | 125                             | HI186        | BioLegend                |
| 147Sm            | CD1c          | 331502                | 125                             | L161         | BioLegend                |
| 148Nd            | CD55          | 311302                | 125                             | JS11         | BioLegend                |
| 149Sm            | CD25          | 3149010B              | 100                             | 2A3          | Standard BioTools        |
| 150Nd            | CD64          | 305002                | 60                              | 10.1         | BioLegend                |
| 151Eu            | CD123         | 306002                | 100                             | 6H6          | BioLegend                |
| 152Sm            | TCRgd         | TCR1061               | 125                             | 5A6.E9       | Thermo Fisher Scientific |
| 153Eu            | Siglec-8      | 837535                | 125                             | 837535       | R&D Systems              |
| 154Sm            | CD95          | 305602                | 125                             | DX2          | BioLegend                |
| 155Gd            | CD73          | 344002                | 60                              | AD2          | BioLegend                |
| 156Gd            | CD20          | 302302                | 200                             | 2H7          | BioLegend                |
| 157Gd            | CD9           | 14-0098-82            | 75                              | SN4 C3-3A2   | eBiosciences             |
| 158Gd            | CD34          | 343502                | 30                              | 581          | BioLegend                |
| 159Tb            | CD22          | 302502                | 60                              | HIB22        | BioLegend                |
| 160Gd            | CD14          | 301802                | 100                             | M5E2         | BioLegend                |
| 161Dy            | CD161         | 339902                | 100                             | HP-3G10      | BioLegend                |
| 162Dy            | CD29          | 303002                | 100                             | TS2/16       | BioLegend                |
| 163Dy            | 4-1BB         | 309802                | 125                             | 4B4-1        | BioLegend                |
| 164Dy            | CD62L         | 304802                | 125                             | DREG-56      | BioLegend                |
| 165Ho            | CD127         | 3165008B              | 100                             | A019D5       | Standard BioTools        |
| 166Er            | CD24          | 311102                | 40                              | ML5          | BioLegend                |
| 167Er            | CD27          | 3167006B              | 100                             | L128         | BioLegend                |

|       |        |          |      |                          |                   |
|-------|--------|----------|------|--------------------------|-------------------|
| 168Er | CD141  | 344102   | 60   | M80                      | BioLegend         |
| 169Tm | CD45RA | 3169008B | 200  | HI100                    | Standard BioTools |
| 170Er | CD38   | 303502   | 60   | HIT2                     | BioLegend         |
| 171Yb | CD85j  | 333702   | 60   | GHI/75                   | BioLegend         |
| 172Yb | CD103  | 350202   | 60   | Ber-ACT8                 | BioLegend         |
| 173Yb | CD56   | 559043   | 150  | NCAM16.2                 | BD Biosciences    |
| 174Yb | CD99   | 318002   | 60   | HCD99                    | BioLegend         |
| 175Lu | CD28   | 302902   | 60   | CD28.2                   | BioLegend         |
| 176Yb | CD39   | 328202   | 60   | A1                       | BioLegend         |
| 191Ir | DNA Ir | 201192A  | 1000 | Cell-ID DNA Intercalator | Standard BioTools |
| 193Ir | DNA Ir | 201192A  | 1000 | Cell-ID DNA Intercalator | Standard BioTools |
| 194Pt | CD8a   | 344702   | 50   | SK1                      | BD Biosciences    |
| 195Pt | CD5    | 300602   | 50   | UCHT2                    | BioLegend         |
| 196Pt | CD7    | 343102   | 200  | CD7-6B7                  | BioLegend         |
| 198Pt | CD4    | 300502   | 85   | RPA-T4                   | BioLegend         |
| 209Bi | CD16   | 3209002B | 100  | 3G8                      | Standard BioTools |

*\*All antibodies that are not from Standard BioTools were purchased in a purified format and coupled*

*In-house.*

**Table 2. Surface staining panel of antibodies used in intracellular mass cytometry.**

| <b>Metal tag</b> | <b>Marker</b> | <b>Catalog number</b> | <b>Antibody dilution, times</b> | <b>Clone</b>             | <b>Vendor*</b>    |
|------------------|---------------|-----------------------|---------------------------------|--------------------------|-------------------|
| 89Y              | CD45          | 3089003B              | 200                             | HI30                     | Standard BioTools |
| 102Pd            | Barcode       | 201060                | -                               | -                        | Standard BioTools |
| 104Pd            | Barcode       | 201060                | -                               | -                        | Standard BioTools |
| 105Pd            | Barcode       | 201060                | -                               | -                        | Standard BioTools |
| 106Pd            | Barcode       | 201060                | -                               | -                        | Standard BioTools |
| 108Pd            | Barcode       | 201060                | -                               | -                        | Standard BioTools |
| 112Cd            | CD11c         | 337202                | 60                              | Bu15                     | BioLegend         |
| 114Cd            | HLA-DR        | 307602                | 125                             | L243                     | BioLegend         |
| 142Nd            | CD19          | 3142001B              | 100                             | HIB19                    | BioLegend         |
| 143Nd            | CD3e          | 317302                | 250                             | UCHT1                    | BioLegend         |
| 145Nd            | CD81          | 349502                | 60                              | 5A6                      | BioLegend         |
| 147Sm            | CD1c          | 331502                | 125                             | L161                     | BioLegend         |
| 151Eu            | CD123         | 306002                | 100                             | 6H6                      | BioLegend         |
| 153Eu            | Siglec-8      | 837535                | 125                             | 837535                   | R&D Systems       |
| 157Gd            | CD9           | 14-0098-82            | 75                              | SN4 C3-3A2               | eBiosciences      |
| 160Gd            | CD14          | 301802                | 100                             | M5E2                     | BioLegend         |
| 161Dy            | CD161         | 339902                | 100                             | HP-3G10                  | BioLegend         |
| 162Dy            | SLAMF7        | 331802                | 100                             | 162.1                    | BioLegend         |
| 167Er            | CD27          | 3167006B              | 100                             | L128                     | BioLegend         |
| 168Er            | CD141         | 344102                | 60                              | M80                      | BioLegend         |
| 169Tm            | CD45RA        | 3169008B              | 200                             | HI100                    | Standard BioTools |
| 173Yb            | CD56          | 559043                | 150                             | NCAM16.2                 | BD Biosciences    |
| 191Ir            | DNA Ir        | 201192A               | 1000                            | Cell-ID DNA Intercalator | Standard BioTools |
| 193Ir            | DNA Ir        | 201192A               | 1000                            | Cell-ID DNA Intercalator | Standard BioTools |
| 194Pt            | CD8a          | 344702                | 50                              | SK1                      | BD Biosciences    |
| 195Pt            | CD5           | 300602                | 50                              | UCHT2                    | BioLegend         |
| 196Pt            | CD7           | 343102                | 200                             | CD7-6B7                  | BioLegend         |
| 198Pt            | CD4           | 300502                | 85                              | RPA-T4                   | BioLegend         |
| 209Bi            | CD16          | 3209002B              | 100                             | 3G8                      | Standard BioTools |

*\*All antibodies that are not from Standard BioTools were purchased in a purified format and coupled in-house.*

**Table 3. Intracellular staining panel of antibodies used in mass cytometry.**

| Metal tag | Marker       | Catalog number | Antibody dilution, times | Clone    | Vendor*           |
|-----------|--------------|----------------|--------------------------|----------|-------------------|
| 149Sm     | IL-4         | 500802         | 75                       | MP4-25D2 | BioLegend         |
| 150Nd     | IFN $\gamma$ | 506502         | 125                      | B27      | BioLegend         |
| 156Gd     | IL-6         | 3156011B       | 100                      | MQ2-13AS | Standard BioTools |
| 159Tb     | IL-1 $\beta$ | 508201         | 60                       | JK1B-1   | BioLegend         |
| 175Lu     | TNF $\alpha$ | 502941         | 75                       | Mab11    | BioLegend         |

\*All antibodies that are not from Standard BioTools were purchased in a purified format and coupled in-house.

**Table 4. Fluorescent marker antibodies (Surface and intracellular) used in spectral flow cytometry.**

| Fluorophore    | Marker         | Catalog number | Antibody dilution, times | Clone                         | Vendor*           |
|----------------|----------------|----------------|--------------------------|-------------------------------|-------------------|
| BUV496         | HLA-DR         | 753685         | 100                      | L243                          | BD Biosciences    |
| BUV737         | CD56           | 612767         | 100                      | NCAM16.2                      | BD Biosciences    |
| BUV805         | CD8            | 612890         | 100                      | SK1                           | BD Biosciences    |
| BV421          | CD123          | 306018         | 100                      | 6H6                           | BioLegend         |
| eF450          | CD15           | 48-0158-41     | 33                       | MMA                           | Invitrogen        |
| BV570          | CD16           | 302035         | 100                      | 3G8                           | BioLegend         |
| FITC           | CD4            | 300505         | 62,5                     | RPA-T4                        | BioLegend         |
| Spark Blue 574 | CD3            | 300487         | 100                      | UCHT1                         | BioLegend         |
| BB630-P2       | CD19           | 624294         | 100                      | SJ25C1                        | BD Biosciences    |
| BB790-P        | CD14           | 624296         | 100                      | M5E2                          | BD Biosciences    |
| RB780          | CD14           | 569069         | 100                      | M5E2                          | BD Biosciences    |
| PE             | AR*            | IC5876P        | 200                      | 523339                        | R&D Systems       |
| PE             | -              | IC0041P        | 40                       | Mouse IgG2B – Isotype control | R&D Systems       |
| APC            | AR*            | IC5876A        | 50                       | 523339                        | R&D Systems       |
| PE             | ESR $\alpha$ # | ab209288       | 5000                     | E115                          | Abcam             |
| PE             | -              | ab37407        | 1250                     | Rabbit IgG – Isotype control  | Abcam             |
| BV421          | IFN $\gamma$   | 506538         | 350                      | B27                           | BioLegend         |
| PE-Cy7         | CCR7           | 353226         | 100                      | G043H7                        | BioLegend         |
| cFluor R685    | CD45RA         | RC-00656       | 100                      | HI100                         | Cytex Biosciences |
| APC            | CD45RA         | 304112         | 100                      | HI100                         | BioLegend         |

\*AR, androgen receptor; #ESR $\alpha$ , estrogen receptor alpha.
