# Supplementary material for: Immune system adaptation during gender-affirming testosterone treatment
Source: PubMed Central journal article supplement (PMC11374716; doi:10.1038/s41586-024-07789-z), 2024-09-04
Supplement: 41586_2024_7789_MOESM2_ESM.pdf [file 41586_2024_7789_MOESM2_ESM.pdf]

## Reporting Summary

Nature Portfolio wishes to improve the reproducibility of the work that we publish. This form provides structure for consistency and transparency in reporting. For further information on Nature Portfolio policies, see our [Editorial Policies](#) and the [Editorial Policy Checklist](#).

### Statistics

For all statistical analyses, confirm that the following items are present in the figure legend, table legend, main text, or Methods section.

n/a | Confirmed

- |                                     |                                     |                                                                                                                                                                                                                                                            |
|-------------------------------------|-------------------------------------|------------------------------------------------------------------------------------------------------------------------------------------------------------------------------------------------------------------------------------------------------------|
| <input type="checkbox"/>            | <input checked="" type="checkbox"/> | The exact sample size ( $n$ ) for each experimental group/condition, given as a discrete number and unit of measurement                                                                                                                                    |
| <input type="checkbox"/>            | <input checked="" type="checkbox"/> | A statement on whether measurements were taken from distinct samples or whether the same sample was measured repeatedly                                                                                                                                    |
| <input type="checkbox"/>            | <input checked="" type="checkbox"/> | The statistical test(s) used AND whether they are one- or two-sided<br><i>Only common tests should be described solely by name; describe more complex techniques in the Methods section.</i>                                                               |
| <input type="checkbox"/>            | <input checked="" type="checkbox"/> | A description of all covariates tested                                                                                                                                                                                                                     |
| <input type="checkbox"/>            | <input checked="" type="checkbox"/> | A description of any assumptions or corrections, such as tests of normality and adjustment for multiple comparisons                                                                                                                                        |
| <input type="checkbox"/>            | <input checked="" type="checkbox"/> | A full description of the statistical parameters including central tendency (e.g. means) or other basic estimates (e.g. regression coefficient) AND variation (e.g. standard deviation) or associated estimates of uncertainty (e.g. confidence intervals) |
| <input type="checkbox"/>            | <input checked="" type="checkbox"/> | For null hypothesis testing, the test statistic (e.g. $F$ , $t$ , $r$ ) with confidence intervals, effect sizes, degrees of freedom and $P$ value noted<br><i>Give <math>P</math> values as exact values whenever suitable.</i>                            |
| <input checked="" type="checkbox"/> | <input type="checkbox"/>            | For Bayesian analysis, information on the choice of priors and Markov chain Monte Carlo settings                                                                                                                                                           |
| <input checked="" type="checkbox"/> | <input type="checkbox"/>            | For hierarchical and complex designs, identification of the appropriate level for tests and full reporting of outcomes                                                                                                                                     |
| <input checked="" type="checkbox"/> | <input type="checkbox"/>            | Estimates of effect sizes (e.g. Cohen's $d$ , Pearson's $r$ ), indicating how they were calculated                                                                                                                                                         |

*Our web collection on [statistics for biologists](#) contains articles on many of the points above.*

### Software and code

Policy information about [availability of computer code](#)

Data collection

No software was used for data collection.

Data analysis

All custom code in GitHub: <https://github.com/Brodinlab/Gender-affirming-Testosterone-treatment>. CyTOF software v8.1 (Standard Biotools), Cytobank Community v10.3 (Beckman Dickinson) and FlowJo 10.10.0 (BD Biosciences).

For manuscripts utilizing custom algorithms or software that are central to the research but not yet described in published literature, software must be made available to editors and reviewers. We strongly encourage code deposition in a community repository (e.g. GitHub). See the Nature Portfolio [guidelines for submitting code & software](#) for further information.

### Data

Policy information about [availability of data](#)

All manuscripts must include a [data availability statement](#). This statement should provide the following information, where applicable:

- Accession codes, unique identifiers, or web links for publicly available datasets
- A description of any restrictions on data availability
- For clinical datasets or third party data, please ensure that the statement adheres to our [policy](#)

Raw mass and flow cytometry data (FCS-files) are available at FlowRepository.org (<https://flowrepository.org/id/FR-FCM-Z75Z>). Plasma protein (Olink), induced cytokines (SIMOA), blood mRNA-sequencing count tables, single-cell mRNA-sequencing count tables as well as ATAC-seq. data is available via Zenodo: <https://zenodo.org/doi/10.5281/zenodo.1151762421>.

## Research involving human participants, their data, or biological material

Policy information about studies with [human participants or human data](#). See also policy information about [sex, gender \(identity/presentation\), and sexual orientation](#) and [race, ethnicity and racism](#).

|                                                                    |                                                                                                                                                                                                                                                                                                                                                                               |
|--------------------------------------------------------------------|-------------------------------------------------------------------------------------------------------------------------------------------------------------------------------------------------------------------------------------------------------------------------------------------------------------------------------------------------------------------------------|
| Reporting on sex and gender                                        | Sex and gender are important considerations for the study and study participants have been described with respect to sex and gender in accordance with Nature policies and with careful consideration of language acceptable to the trans community. The co-authors have consulted representatives of the trans community in planning the study and preparing the manuscript. |
| Reporting on race, ethnicity, or other socially relevant groupings | Race and ethnicity are not reported.                                                                                                                                                                                                                                                                                                                                          |
| Population characteristics                                         | Age and sex is reported and taken into account into mixed effects models and described when appropriate.                                                                                                                                                                                                                                                                      |
| Recruitment                                                        | 23 adult individuals who were assigned female at birth and were undergoing masculinizing gender-affirming treatment were enrolled at specialist centers for transgender medicine in Stockholm, Uppsala, Linköping, and Umeå in Sweden between 2016 and 2023.                                                                                                                  |
| Ethics oversight                                                   | Swedish Ethical Review Authority (2016/1422-31/1).                                                                                                                                                                                                                                                                                                                            |

Note that full information on the approval of the study protocol must also be provided in the manuscript.

## Field-specific reporting

Please select the one below that is the best fit for your research. If you are not sure, read the appropriate sections before making your selection.

Life sciences  Behavioural & social sciences  Ecological, evolutionary & environmental sciences

For a reference copy of the document with all sections, see [nature.com/documents/nr-reporting-summary-flat.pdf](https://nature.com/documents/nr-reporting-summary-flat.pdf)

## Life sciences study design

All studies must disclose on these points even when the disclosure is negative.

|                 |                                                                                                                                                    |
|-----------------|----------------------------------------------------------------------------------------------------------------------------------------------------|
| Sample size     | The number of included subjects was maximized but not pre-specified by a priori power analysis.                                                    |
| Data exclusions | No exclusions                                                                                                                                      |
| Replication     | All in vitro experiments performed on healthy donor blood samples were performed repeatedly to ensure reproducibility and all replicates reported. |
| Randomization   | This was an observational study and not a treatment investigation, thus randomization was not performed.                                           |
| Blinding        | Blinded therapy would not have been possible given the striking and well-established consequences of testosterone therapy.                         |

## Reporting for specific materials, systems and methods

We require information from authors about some types of materials, experimental systems and methods used in many studies. Here, indicate whether each material, system or method listed is relevant to your study. If you are not sure if a list item applies to your research, read the appropriate section before selecting a response.

### Materials & experimental systems

| n/a                                 | Involvement in the study                               |
|-------------------------------------|--------------------------------------------------------|
| <input type="checkbox"/>            | <input checked="" type="checkbox"/> Antibodies         |
| <input checked="" type="checkbox"/> | <input type="checkbox"/> Eukaryotic cell lines         |
| <input checked="" type="checkbox"/> | <input type="checkbox"/> Palaeontology and archaeology |
| <input checked="" type="checkbox"/> | <input type="checkbox"/> Animals and other organisms   |
| <input checked="" type="checkbox"/> | <input type="checkbox"/> Clinical data                 |
| <input checked="" type="checkbox"/> | <input type="checkbox"/> Dual use research of concern  |
| <input checked="" type="checkbox"/> | <input type="checkbox"/> Plants                        |

### Methods

| n/a                                 | Involvement in the study                           |
|-------------------------------------|----------------------------------------------------|
| <input checked="" type="checkbox"/> | <input type="checkbox"/> ChIP-seq                  |
| <input type="checkbox"/>            | <input checked="" type="checkbox"/> Flow cytometry |
| <input checked="" type="checkbox"/> | <input type="checkbox"/> MRI-based neuroimaging    |

## Antibodies

|                 |                                                                      |
|-----------------|----------------------------------------------------------------------|
| Antibodies used | Table 1. Broad extension panel of antibodies used in mass cytometry. |
|-----------------|----------------------------------------------------------------------|

Metal tag Marker Catalog number Antibody dilution, times Clone Vendor\*

89Y CD45 3089003B 200 HI30 Standard BioTools  
 102Pd Barcode 201060 - - Standard BioTools  
 104Pd Barcode 201060 - - Standard BioTools  
 105Pd Barcode 201060 - - Standard BioTools  
 106Pd Barcode 201060 - - Standard BioTools  
 108Pd Barcode 201060 - - Standard BioTools  
 110Cd CD33 303402 125 WM53 BioLegend  
 111Cd CD26 302702 60 BA5b BioLegend  
 112Cd CD11c 337202 60 Bu15 BioLegend  
 113Cd IgD 348202 250 IA6-2 BioLegend  
 114Cd HLA-DR 307602 125 L243 BioLegend  
 115In CD57 322302 200 HCD57 BioLegend  
 140Ce CD71 334102 200 CY1G4 BioLegend  
 141Pr CD49d 3141004B 100 9F10 Standard BioTools  
 142Nd CD43 14-0439-82 125 84-3C1 eBiosciences  
 143Nd CD3e 317302 250 UCHT1 BioLegend  
 144Nd CD45RB 310202 125 MEM-55 BioLegend  
 145Nd CD81 349502 60 5A6 BioLegend  
 146Nd CD52 316002 125 HI186 BioLegend  
 147Sm CD1c 331502 125 L161 BioLegend  
 148Nd CD55 311302 125 JS11 BioLegend  
 149Sm CD25 3149010B 100 2A3 Standard BioTools  
 150Nd CD64 305002 60 10.1 BioLegend  
 151Eu CD123 306002 100 6H6 BioLegend  
 152Sm TCRgd TCR1061 125 5A6.E9 Thermo Fisher Scientific  
 153Eu Siglec-8 837535 125 837535 R&D Systems  
 154Sm CD95 305602 125 DX2 BioLegend  
 155Gd CD73 344002 60 AD2 BioLegend  
 156Gd CD20 302302 200 2H7 BioLegend  
 157Gd CD9 14-0098-82 75 SN4 C3-3A2 eBiosciences  
 158Gd CD34 343502 30 581 BioLegend  
 159Tb CD22 302502 60 HIB22 BioLegend  
 160Gd CD14 301802 100 M5E2 BioLegend  
 161Dy CD161 339902 100 HP-3G10 BioLegend  
 162Dy CD29 303002 100 TS2/16 BioLegend  
 163Dy 4-1BB 309802 125 4B4-1 BioLegend  
 164Dy CD62L 304802 125 DREG-56 BioLegend  
 165Ho CD127 3165008B 100 A019D5 Standard BioTools  
 166Er CD24 311102 40 ML5 BioLegend  
 167Er CD27 3167006B 100 L128 BioLegend  
 168Er CD141 344102 60 M80 BioLegend  
 169Tm CD45RA 3169008B 200 HI100 Standard BioTools  
 170Er CD38 303502 60 HIT2 BioLegend  
 171Yb CD85j 333702 60 GHI/75 BioLegend  
 172Yb CD103 350202 60 Ber-ACT8 BioLegend  
 173Yb CD56 559043 150 NCAM16.2 BD Biosciences  
 174Yb CD99 318002 60 HCD99 BioLegend  
 175Lu CD28 302902 60 CD28.2 BioLegend  
 176Yb CD39 328202 60 A1 BioLegend  
 191Ir DNA Ir 201192A 1000 Cell-ID DNA Intercalator Standard BioTools  
 193Ir DNA Ir 201192A 1000 Cell-ID DNA Intercalator Standard BioTools  
 194Pt CD8a 344702 50 SK1 BD Biosciences  
 195Pt CD5 300602 50 UCHT2 BioLegend  
 196Pt CD7 343102 200 CD7-6B7 BioLegend  
 198Pt CD4 300502 85 RPA-T4 BioLegend  
 209Bi CD16 3209002B 100 3G8 Standard BioTools

\*All antibodies that are not from Standard BioTools were purchased in a purified format and coupled in-house.

Table 2. Surface staining panel of antibodies used in intracellular mass cytometry.

Metal tag Marker Catalog number Antibody dilution, times Clone Vendor\*

89Y CD45 3089003B 200 HI30 Standard BioTools  
 102Pd Barcode 201060 - - Standard BioTools  
 104Pd Barcode 201060 - - Standard BioTools  
 105Pd Barcode 201060 - - Standard BioTools  
 106Pd Barcode 201060 - - Standard BioTools  
 108Pd Barcode 201060 - - Standard BioTools

112Cd CD11c 337202 60 Bu15 BioLegend  
 114Cd HLA-DR 307602 125 L243 BioLegend  
 142Nd CD19 3142001B 100 HIB19 BioLegend  
 143Nd CD3e 317302 250 UCHT1 BioLegend  
 145Nd CD81 349502 60 5A6 BioLegend  
 147Sm CD1c 331502 125 L161 BioLegend  
 151Eu CD123 306002 100 6H6 BioLegend  
 153Eu Siglec-8 837535 125 837535 R&D Systems  
 157Gd CD9 14-0098-82 75 SN4 C3-3A2 eBiosciences  
 160Gd CD14 301802 100 M5E2 BioLegend  
 161Dy CD161 339902 100 HP-3G10 BioLegend  
 162Dy SLAMF7 331802 100 162.1 BioLegend  
 167Er CD27 3167006B 100 L128 BioLegend  
 168Er CD141 344102 60 M80 BioLegend  
 169Tm CD45RA 3169008B 200 HI100 Standard BioTools  
 173Yb CD56 559043 150 NCAM16.2 BD Biosciences  
 191Ir DNA Ir 201192A 1000 Cell-ID DNA Intercalator Standard BioTools  
 193Ir DNA Ir 201192A 1000 Cell-ID DNA Intercalator Standard BioTools  
 194Pt CD8a 344702 50 SK1 BD Biosciences  
 195Pt CD5 300602 50 UCHT2 BioLegend  
 196Pt CD7 343102 200 CD7-6B7 BioLegend  
 198Pt CD4 300502 85 RPA-T4 BioLegend  
 209Bi CD16 3209002B 100 3G8 Standard BioTools  
 \*All antibodies that are not from Standard BioTools were purchased in a purified format and coupled in-house.

Table 3. Intracellular staining panel of antibodies used in mass cytometry.

Metal tag Marker Catalog number Antibody dilution, times Clone Vendor\*

149Sm IL-4 500802 75 MP4-25D2 BioLegend  
 150Nd IFN $\gamma$  506502 125 B27 BioLegend  
 156Gd IL-6 3156011B 100 MQ2-13AS Standard BioTools  
 159Tb IL-1 $\beta$  508201 60 JK1B-1 BioLegend  
 175Lu TNF 502941 75 Mab11 BioLegend

\*All antibodies that are not from Standard BioTools were purchased in a purified format and coupled in-house.

Table 4. Fluorescent marker antibodies (Surface and intracellular) used in spectral flow cytometry.

Fluorophore Marker Catalog number Antibody dilution, times Clone Vendor\*

BUV496 HLA-DR 753685 100 L243 BD Biosciences  
 BUV737 CD56 612767 100 NCAM16.2 BD Biosciences  
 BUV805 CD8 612890 100 SK1 BD Biosciences  
 BV421 CD123 306018 100 6H6 BioLegend  
 eF450 CD15 48-0158-41 33 MMA Invitrogen  
 BV570 CD16 302035 100 3G8 BioLegend  
 FITC CD4 300505 62,5 RPA-T4 BioLegend  
 Spark Blue 574 CD3 300487 100 UCHT1 BioLegend  
 BB630-P2 CD19 624294 100 SJ25C1 BD Biosciences  
 BB790-P CD14 624296 100 M5E2 BD Biosciences  
 RB780 CD14 569069 100 M5E2 BD Biosciences  
 PE AR\* IC5876P 200 523339 R&D Systems  
 PE - IC0041P 40 Mouse IgG2B –  
 Isotype control R&D Systems  
 APC AR\* IC5876A 50 523339 R&D Systems  
 PE ESR# ab209288 5000 E115 Abcam  
 PE - ab37407 1250 Rabbit IgG –  
 Isotype control Abcam  
 BV421 IFN $\gamma$  506538 350 B27 BioLegend  
 PE-Cy7 CCR7 353226 100 G043H7 BioLegend  
 cFluor R685 CD45RA RC-00656 100 HI100 Cytek Biosciences  
 APC CD45RA 304112 100 HI100 BioLegend

\*AR, androgen receptor; #ESR, estrogen receptor alpha.

#### Validation

Specificity testing of 1-3 target cell types with either single- or multi-color analysis (including positive and negative cell types). Once specificity is confirmed, each new lot must perform with similar intensity to the in-date reference lot. Brightness (MFI) is evaluated from both positive and negative populations. Each lot product is validated by QC testing with a series of titration dilutions. Independent validation was performed by fluorescence/mass-minus one, negative and positive controls and where possible such as MCF7 cells (human breast adenocarcinoma cell line) expressing ESR and AR.

## Plants

|                       |     |
|-----------------------|-----|
| Seed stocks           | N/A |
| Novel plant genotypes | N/A |
| Authentication        | N/A |

## Flow Cytometry

### Plots

Confirm that:

- The axis labels state the marker and fluorochrome used (e.g. CD4-FITC).
- The axis scales are clearly visible. Include numbers along axes only for bottom left plot of group (a 'group' is an analysis of identical markers).
- All plots are contour plots with outliers or pseudocolor plots.
- A numerical value for number of cells or percentage (with statistics) is provided.

### Methodology

|                           |                                                                                                                                                                                                                                                                                                                                                                                                                                                                                   |
|---------------------------|-----------------------------------------------------------------------------------------------------------------------------------------------------------------------------------------------------------------------------------------------------------------------------------------------------------------------------------------------------------------------------------------------------------------------------------------------------------------------------------|
| Sample preparation        | For Mass cytometry experiments, whole blood stabilized at blood collection is used and for in vitro stimulation and hormone treatment experiments, whole blood or PBMCs were used. Details are described in supplementary methods.                                                                                                                                                                                                                                                |
| Instrument                | CyTOF XT (Standard BioTools), Aurora spectral flow cytometer (Cytek Biosciences).                                                                                                                                                                                                                                                                                                                                                                                                 |
| Software                  | CyTOF software v8.1 (Standard Biotoools) was used for acquisition of mass cytometry data. Cytobank Community v10.3 (Beckman Dickinson) and FlowJo 10.10.0 (BD Biosciences) were used for manual gating and plotting. For modeling and statistical analyses custom R scripts were used and are available through GitHub: <a href="https://github.com/Brodinlab/Gender-affirming-Testosterone-treatment">https://github.com/Brodinlab/Gender-affirming-Testosterone-treatment</a> . |
| Cell population abundance | N/A                                                                                                                                                                                                                                                                                                                                                                                                                                                                               |
| Gating strategy           | Gating templates are shared via FlowRepository.org and for pre-DC gating it is shared in Extended Data Fig. 2c                                                                                                                                                                                                                                                                                                                                                                    |

- Tick this box to confirm that a figure exemplifying the gating strategy is provided in the Supplementary Information.
